# Supplementary material for: Oral Glucocorticoid Use and Long-Term Mortality in Patients with Chronic Musculoskeletal Non-Cancer Pain: A Cross-Sectional Cohort Study
Source: MDPI journal article supplement (doi:10.3390/diagnostics13152521), 2023-07-28
Supplement: s1 [file s1]

Supplementary Material S5. Multivariable time-dependent Cox regression model for all-cause mortality during 2012-2019 among cohort with CNCP in 2010.

| Variable             | HR (95% CI)       | <i>P</i> -value |
|----------------------|-------------------|-----------------|
| GC user (vs control) | 1.45 (1.36, 1.54) | <0.001          |

CNCP, chronic non-cancer pain; HR, hazard ratio; CI, confidence interval; GC, glucocorticoid
