# Supplementary material for: Oral Glucocorticoid Use and Long-Term Mortality in Patients with Chronic Musculoskeletal Non-Cancer Pain: A Cross-Sectional Cohort Study
Source: MDPI journal article supplement (doi:10.3390/diagnostics13152521), 2023-07-28
Supplement: s1 [file s1]

Supplementary Material S4. GC exposure during 2011-2019

|                                        | GC use in<br>2011 | GC use in<br>2012 | GC use in<br>2013 | GC use in<br>2014 | GC use in<br>2015 | GC use in<br>2016 | GC use in<br>2017 | GC use in<br>2018 | GC use in<br>2019 |
|----------------------------------------|-------------------|-------------------|-------------------|-------------------|-------------------|-------------------|-------------------|-------------------|-------------------|
| GC user in<br>2010<br>n=9,038          | 5,208 (57.6)      | 3,969 (43.9)      | 3,358 (37.2)      | 2,918 (32.3)      | 2,587 (28.6)      | 2,353 (26.0)      | 2,138 (23.7)      | 1,932 (21.4)      | 1,735 (19.2)      |
| Non-GC<br>users in 2010<br>n=1,794,981 | 4,485 (0.2)       | 6,359 (0.4)       | 7,298 (0.4)       | 8,084 (0.5)       | 8,991 (0.5)       | 9,492 (0.5)       | 10,159 (0.6)      | 10,996 (0.6)      | 11,603 (0.6)      |

GC, glucocorticoid
