# Supplementary material for: Oral Glucocorticoid Use and Long-Term Mortality in Patients with Chronic Musculoskeletal Non-Cancer Pain: A Cross-Sectional Cohort Study
Source: Diagnostics (Basel). 2023 Jul 28;13(15):2521. doi: 10.3390/diagnostics13152521 (PMC10416933; doi:10.3390/diagnostics13152521)
Supplement: Supplementary file 1 [file diagnostics-13-02521-s001.zip]

Archive with 5 entries (5 files):
- diagnostics-2502271-supplementary/Supplementary Material  S1.pdf
- diagnostics-2502271-supplementary/Supplementary Material  S2.pdf
- diagnostics-2502271-supplementary/Supplementary Material  S3.pdf
- diagnostics-2502271-supplementary/Supplementary Material  S4.pdf
- diagnostics-2502271-supplementary/Supplementary Material  S5.pdf
